# Supplementary material
Source: PubMed Central journal article supplement (PMC7931502)
Supplement: 41423_2021_654_MOESM2_ESM.pdf [file 41423_2021_654_MOESM2_ESM.pdf]

**A**
█ Positive    █ Negative
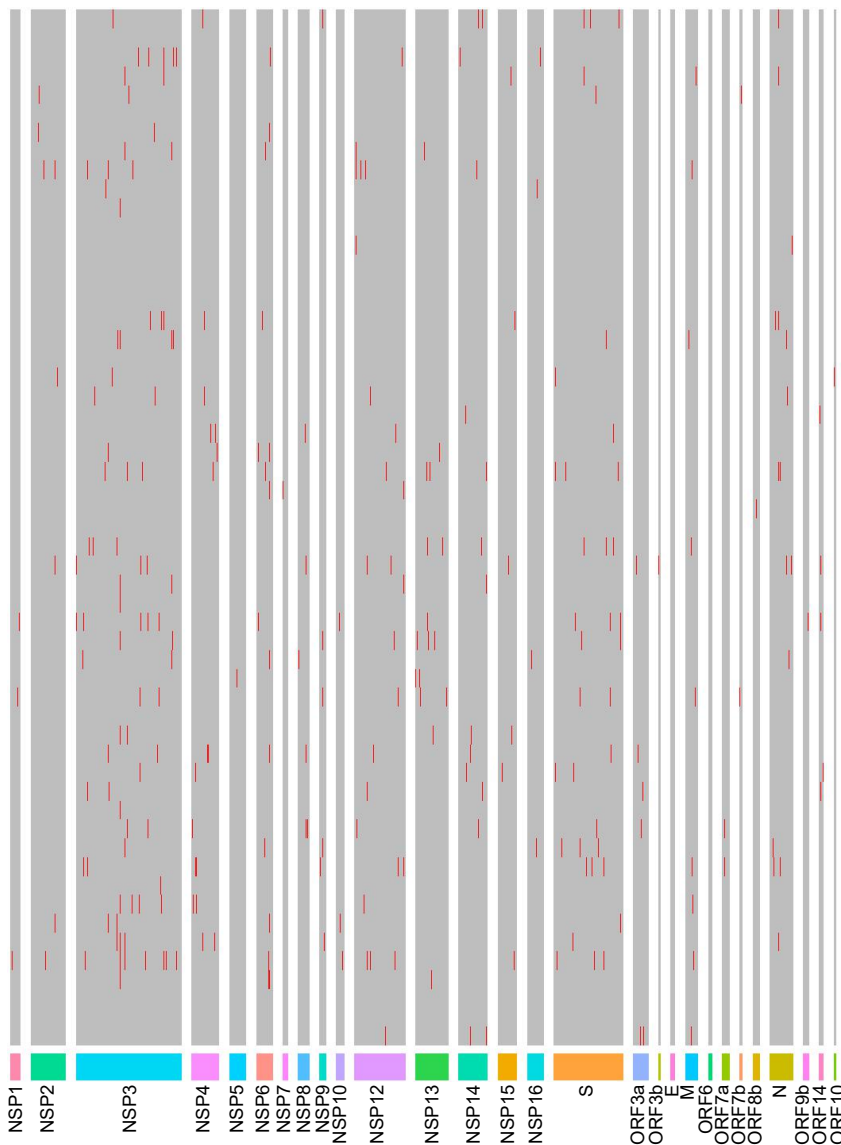**Patient**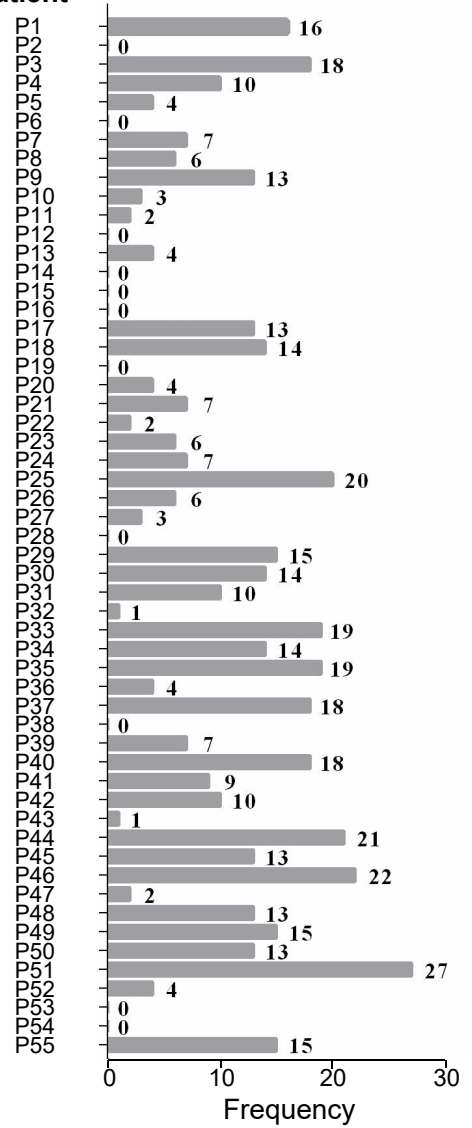**B**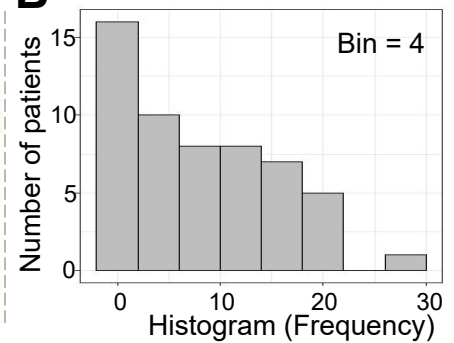**C**

| Protein                 | NSP1 | NSP2 | NSP3 | NSP4 | NSP5 | NSP6 | NSP7 | NSP8 | NSP9 | NSP10 | NSP12 | NSP13 | NSP14 | NSP15 | NSP16 | S    | ORF3a | ORF3b | E    | M    | ORF6 | ORF7a | ORF7b | ORF8b | N    | ORF9b | ORF14 | ORF10 |
|-------------------------|------|------|------|------|------|------|------|------|------|-------|-------|-------|-------|-------|-------|------|-------|-------|------|------|------|-------|-------|-------|------|-------|-------|-------|
| Sum_epitopes            | 8    | 16   | 125  | 30   | 7    | 20   | 1    | 8    | 9    | 3     | 48    | 22    | 26    | 9     | 11    | 69   | 9     | 1     | 1    | 12   | 0    | 3     | 2     | 2     | 20   | 1     | 5     | 1     |
| Length                  | 180  | 638  | 1945 | 500  | 306  | 290  | 83   | 198  | 113  | 139   | 932   | 601   | 527   | 346   | 298   | 1273 | 275   | 22    | 75   | 222  | 61   | 121   | 43    | 121   | 419  | 97    | 73    | 38    |
| Sum_epitopes/<br>Length | 0.04 | 0.03 | 0.06 | 0.06 | 0.02 | 0.07 | 0.01 | 0.04 | 0.08 | 0.02  | 0.05  | 0.04  | 0.05  | 0.03  | 0.04  | 0.05 | 0.03  | 0.05  | 0.01 | 0.05 | 0.00 | 0.02  | 0.05  | 0.02  | 0.05 | 0.01  | 0.07  | 0.03  |

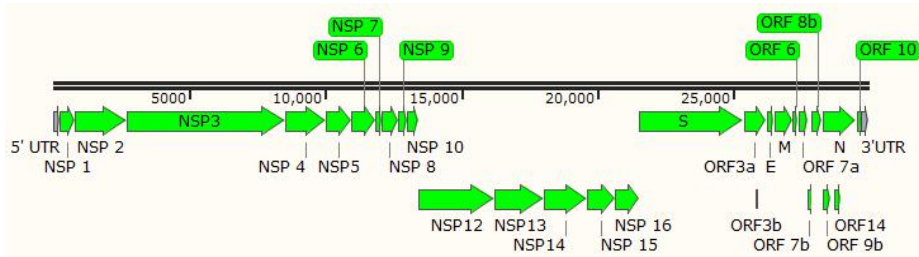

**Fig. S1 The map of SARS-CoV-2 specific IgG binding epitopes revealed from convalescent sera directly. (A)** The epitopes (**Table S3**) of each patient (P1-P55) were plotted alongside the known SARS-CoV-2 proteins from N terminal to C terminal. The total number of the identified epitopes for each patient and each protein were defined as frequency and sum\_epitopes, respectively. **(B)** The histogram of the epitope frequency (bin = 4). **(C)** The sum\_epitopes of each protein, length of proteins and ratio of sum\_epitopes and length.

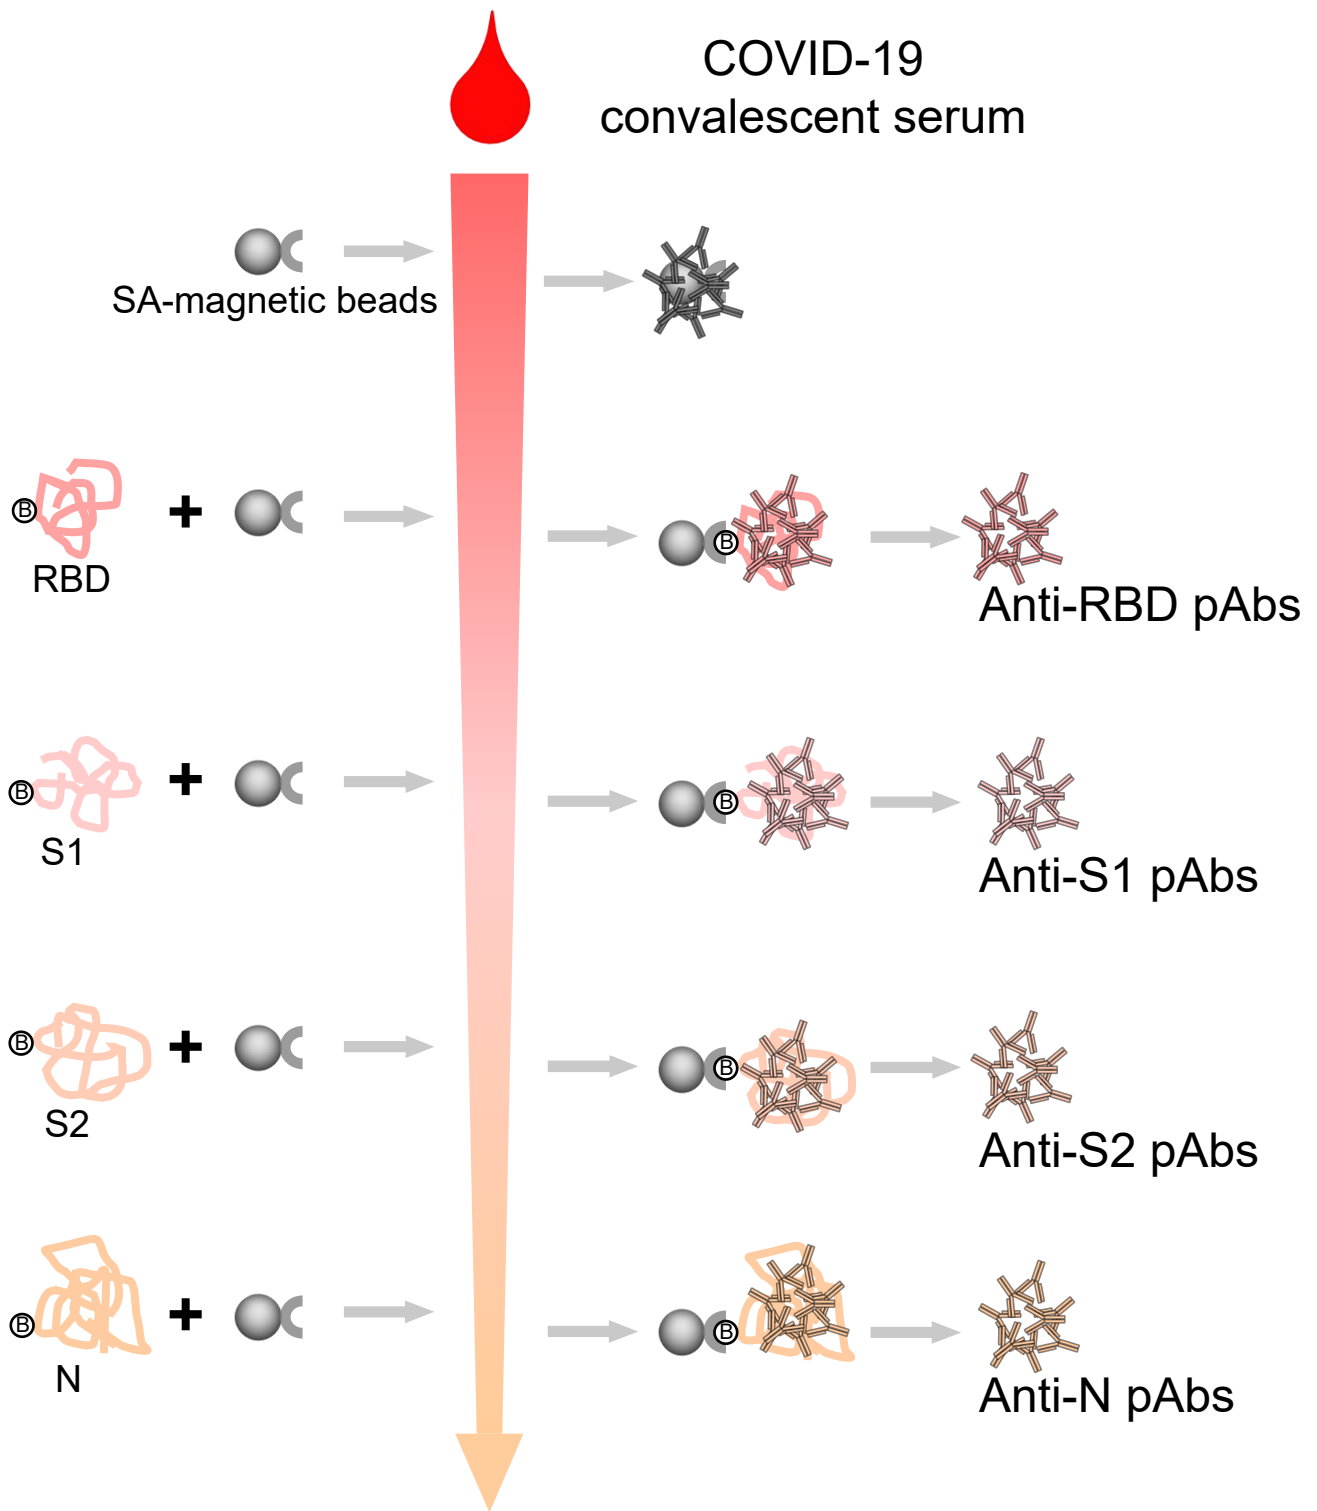

**Fig. S2 Protein specific antibodies enrichment from COVID 19 convalescent sera.** COVID-19 convalescent sera were used as input. Terminal biotinylated proteins were used as baits to enrich specific antibodies. SA conjugated magnetic beads were adopted to isolate the antibodies.

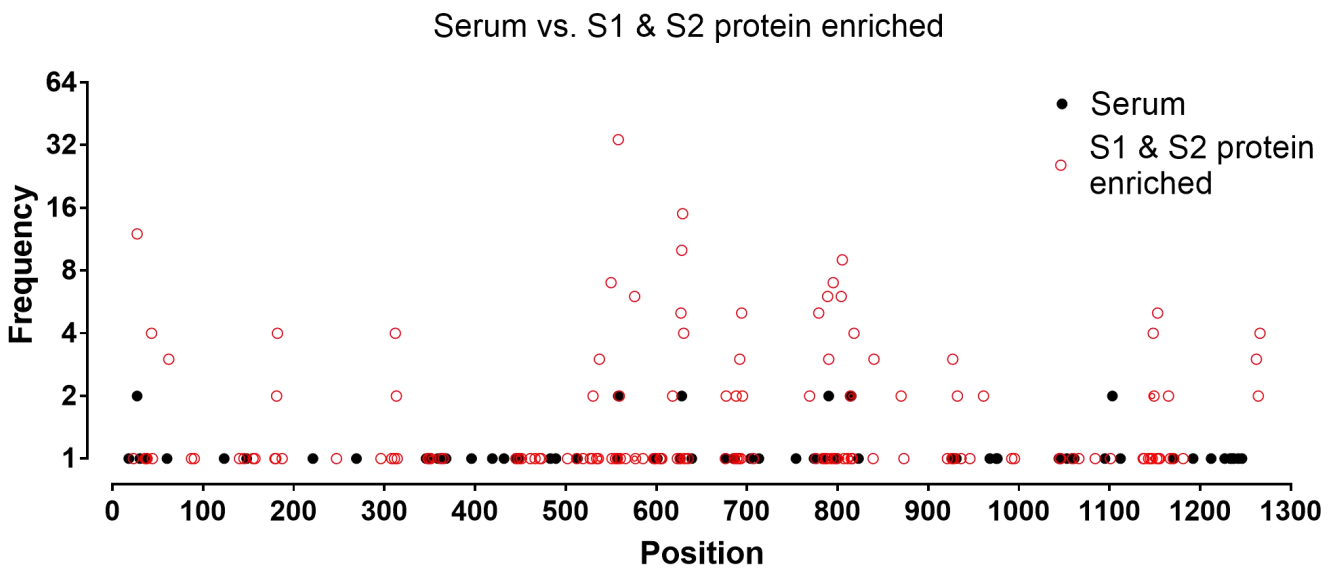

**Fig. S3. Protein based antibody enrichment is necessary for AbMap.** S protein specific epitopes identified from sera directly (black dot), and S1+S2 protein enriched antibodies (red dot).

**A**

| No. | ID            | Sequence | Position  | Frequency |
|-----|---------------|----------|-----------|-----------|
| 1   | Epitope-S1-1  | AYTNSFTR | 27-34     | 12        |
| 2   | Epitope-S1-2  | FRSSVLHS | 43-50     | 4         |
| 3   | Epitope-S1-3  | VTWFHAIH | 62-69     | 3         |
| 4   | Epitope-S1-4  | KQGNFKNL | 182-189   | 4         |
| 5   | Epitope-S1-5  | IYQTSNFR | 312-319   | 4         |
| 6   | Epitope-S1-6  | KCVNFNFN | 537-544   | 3         |
| 7   | Epitope-S1-7  | GVLTESNK | 550-557   | 7         |
| 8   | Epitope-S1-8  | KFLPFQQF | 558-565   | 34        |
| 9   | Epitope-S1-9  | VRDPQTLE | 576-583   | 6         |
| 10  | Epitope-S1-10 | DQLTPTWR | 627-634   | 5         |
| 11  | Epitope-S1-11 | QLTPTWRV | 628-635   | 10        |
| 12  | Epitope-S1-12 | LTPTWRVY | 629-636   | 15        |
| 13  | Epitope-S1-13 | TPTWRVYS | 630-637   | 4         |
| 14  | Epitope-S2-1  | IIAYTMSL | 692-699   | 3         |
| 15  | Epitope-S2-2  | AYTMSLGA | 694-701   | 5         |
| 16  | Epitope-S2-3  | QEVFAQVK | 779-786   | 5         |
| 17  | Epitope-S2-4  | YKTPPIKD | 789-796   | 6         |
| 18  | Epitope-S2-5  | KTPPIKDF | 790-797   | 3         |
| 19  | Epitope-S2-6  | KDFGGFNF | 795-802   | 7         |
| 20  | Epitope-S2-7  | QILPDPSK | 804-811   | 7         |
| 21  | Epitope-S2-8  | ILPDPSKP | 805-812   | 9         |
| 22  | Epitope-S2-9  | IEDLLFNK | 818-825   | 4         |
| 23  | Epitope-S2-10 | CLGDIAAR | 840-847   | 3         |
| 24  | Epitope-S2-11 | FNSAIGKI | 927-934   | 3         |
| 25  | Epitope-S2-12 | FKEELDKY | 1148-1155 | 4         |
| 26  | Epitope-S2-13 | DKYFKNHT | 1153-1160 | 5         |
| 27  | Epitope-S2-14 | EPVLKGVK | 1262-1269 | 3         |
| 28  | Epitope-S2-15 | KGVKLHYT | 1266-1273 | 4         |
| 29  | Epitope-RBD-1 | RDISTEY  | 466-473   | 2         |

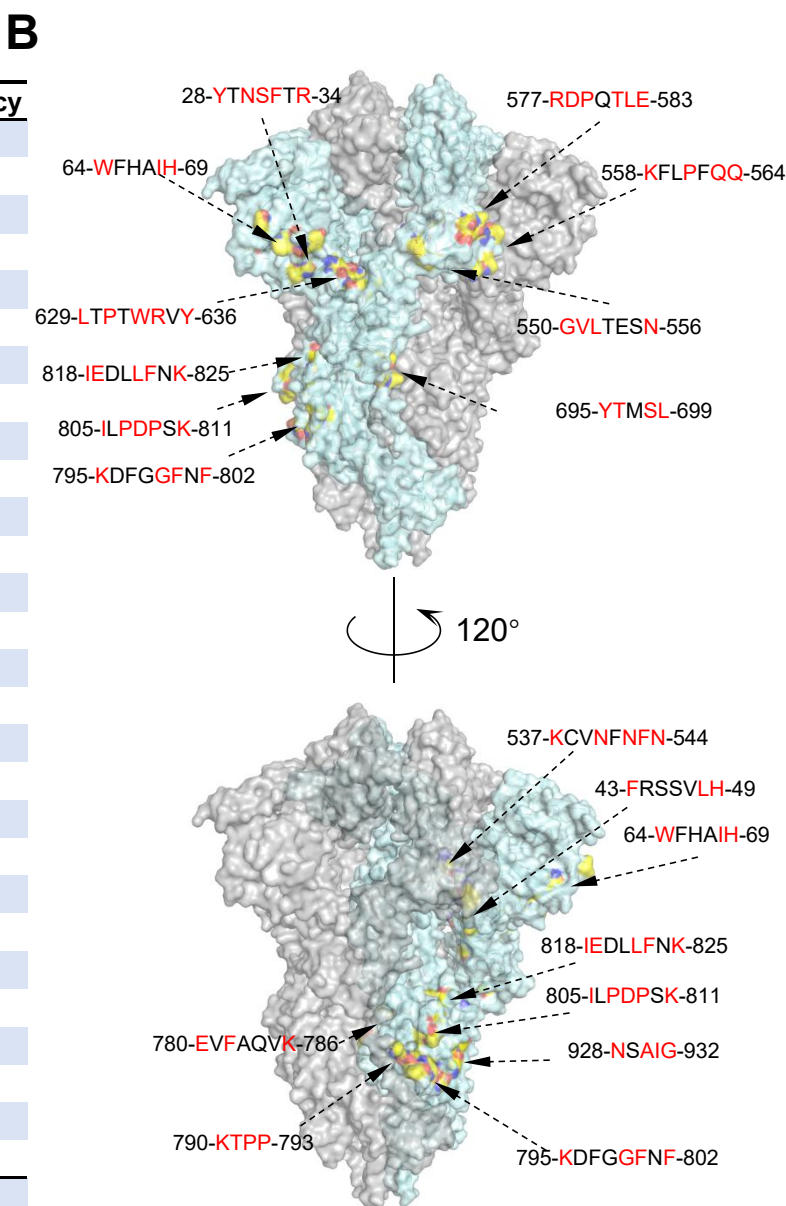

**Fig. S4. Detailed information of the significant epitopes on S protein. (A)** The list of the significant epitopes (frequency  $\geq 3$ ), **(B)** The distribution of the significant epitopes (frequency  $\geq 3$ ) on the trimer 3D structure of the S protein. Red marked amino acids represent critical residues of epitopes.

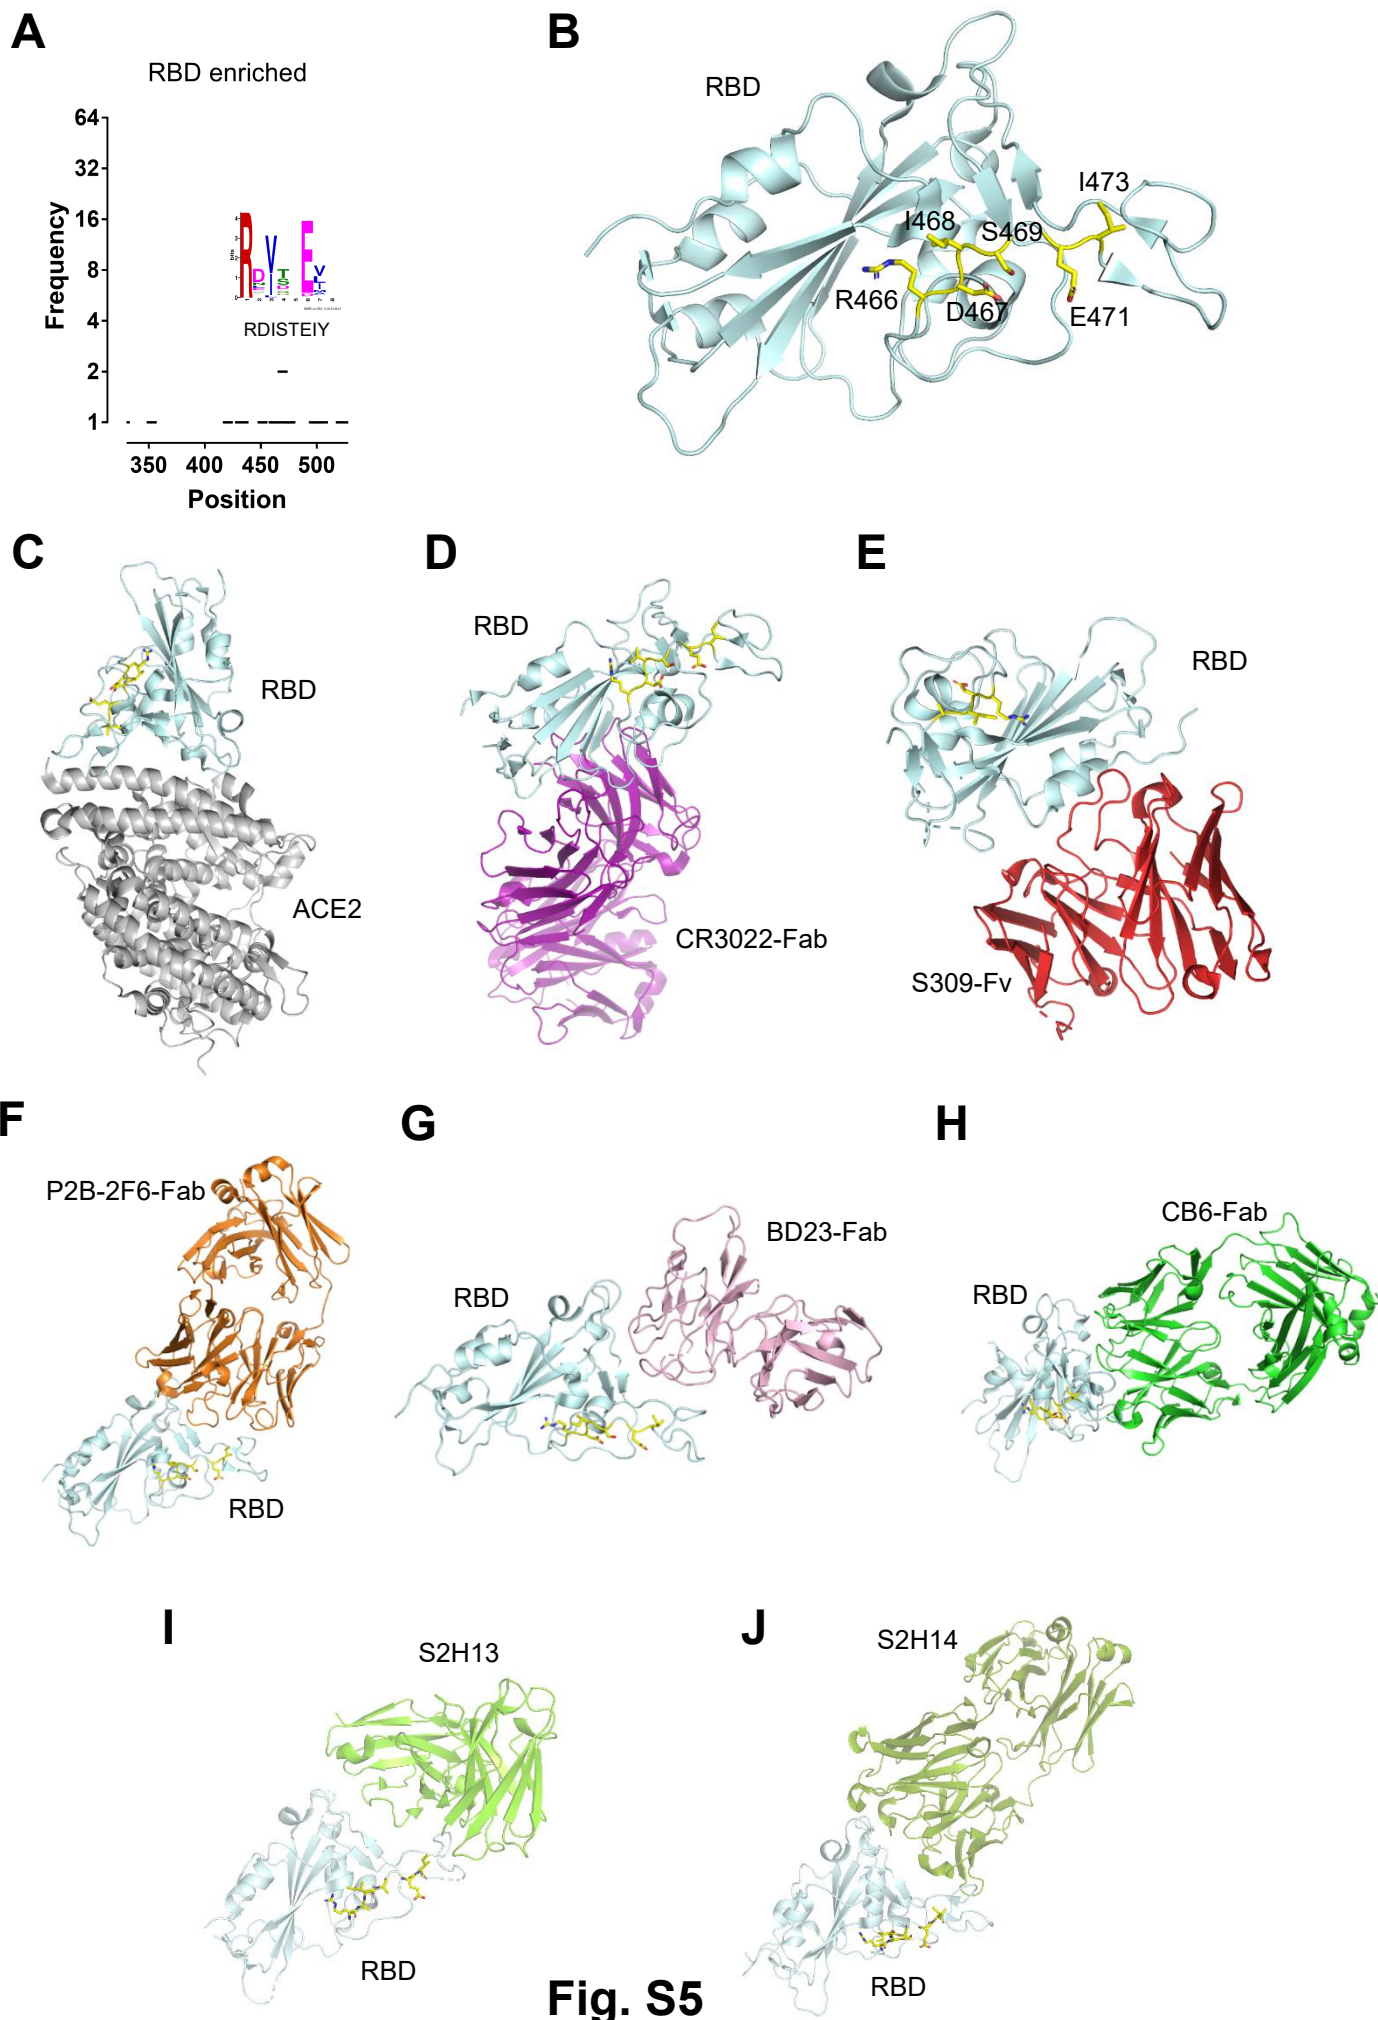

**Fig. S5. Functional analysis of several key sites of the significant epitopes of S protein. (A)** One relatively significant epitope (frequency  $\geq 2$ ) was identified for RBD enriched antibody. **(B)** Match the critical epitope residues to the structure of RBD. **(C)** The critical epitope residues locate adjacent to but not at the binding interfaces of RBD and ACE2. **(D-J)** <sup>1-6</sup> The critical epitope residues locate adjacent to but not at the binding interfaces of RBD strong binding antibodies or highly potent neutralization antibodies, CR3022-Fab **(D)**, S309-Fv **(E)**, P2B-2F6-Fab **(F)**, BD23-Fab **(G)**, CB6-Fab **(H)**, S2H13 **(I)** and S2H14 **(J)**.

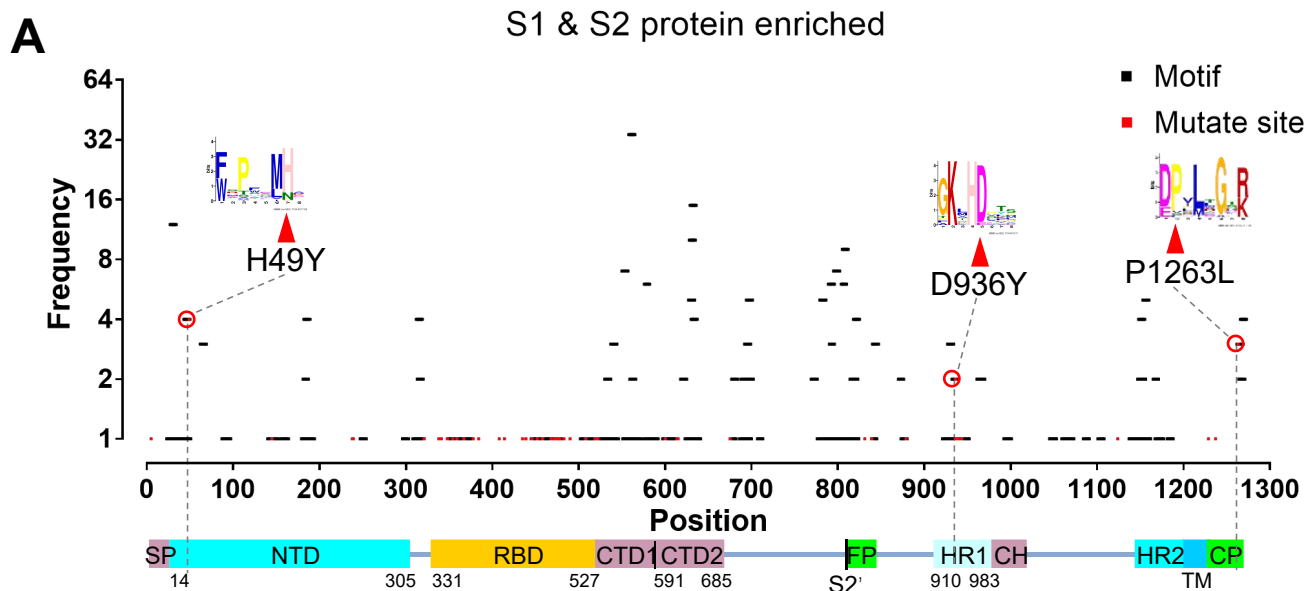

| Mutation | Location         | Mutate rate | Infectivity |
|----------|------------------|-------------|-------------|
| H49Y     | NTD              | 0.24%       | -           |
| D936Y    | HR1              | 0.01%       | 60~70% ↓    |
| P1263L   | Cytoplasmic Tail | 0.01%       | 98~99% ↓    |

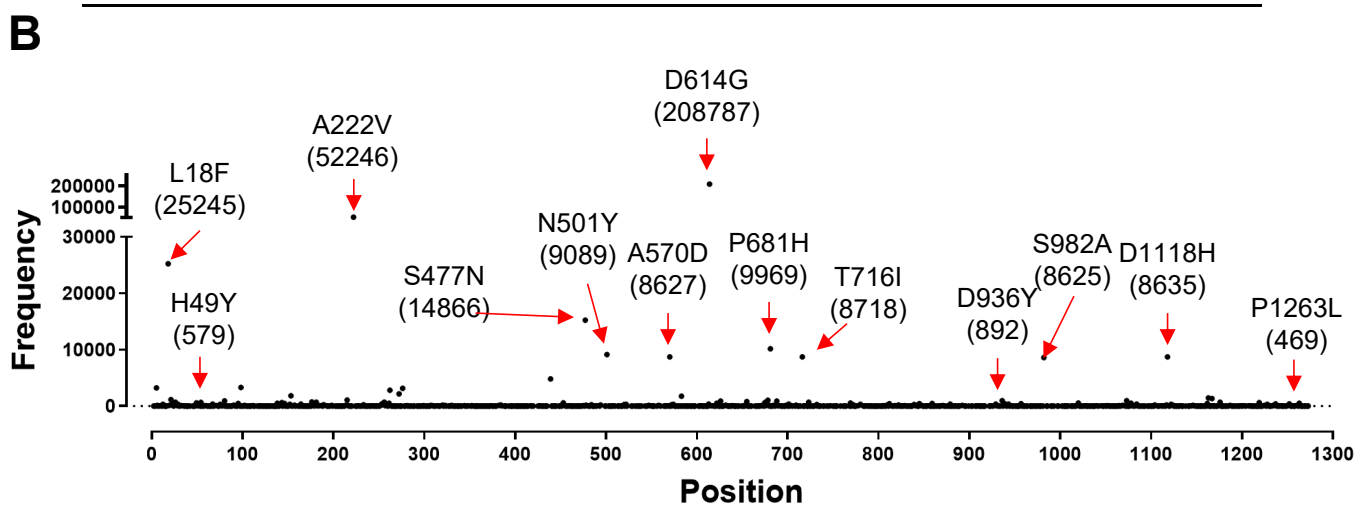

**Fig. S6. Match the critical epitope residues with naturally existing mutants of Spike protein. (A) Match the epitopes on S protein with the critical naturally existing mutants<sup>7,8</sup>. (B) The Substitution mutants of Spike protein collected by China National Center for Bioinformation were plotted alongside the Spike protein with the mutated frequency. (The data were collected by 2021-1-12)**



**A****N protein enriched**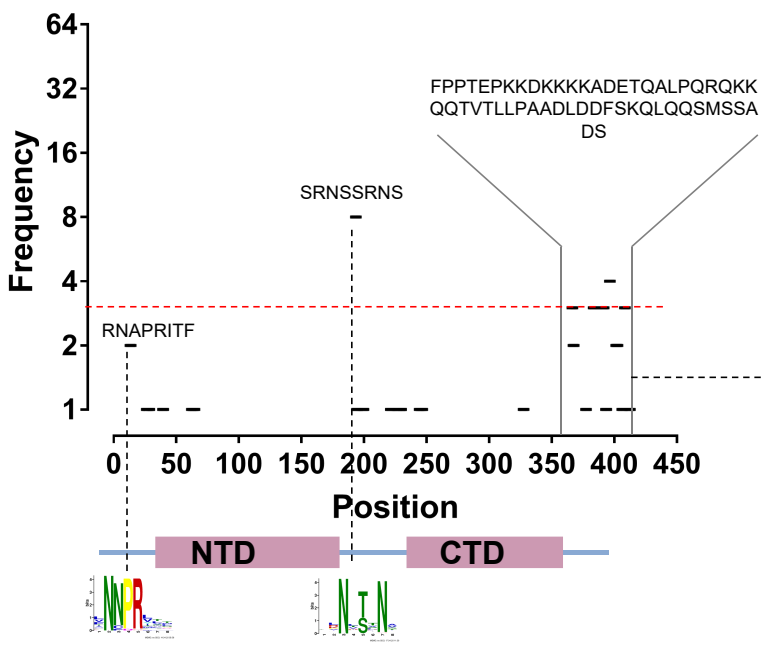**B**

| No. | ID          | Sequence | Position | Frequency |
|-----|-------------|----------|----------|-----------|
| 1   | Epitope-N-1 | SRNSSRNS | 190-197  | 8         |
| 2   | Epitope-N-2 | FPPTEPKK | 363-370  | 3         |
| 3   | Epitope-N-3 | QALPQRQK | 380-387  | 3         |
| 4   | Epitope-N-4 | KQQTVTLL | 388-395  | 3         |
| 5   | Epitope-N-5 | TLLPAADL | 393-400  | 4         |
| 6   | Epitope-N-6 | KQLQQSMS | 405-412  | 3         |

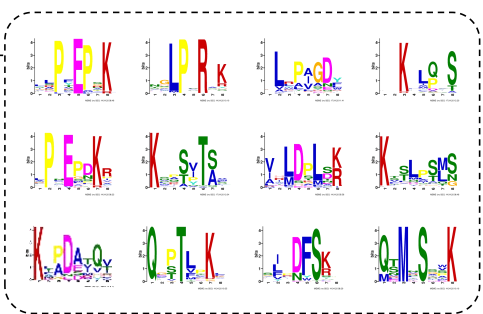**C**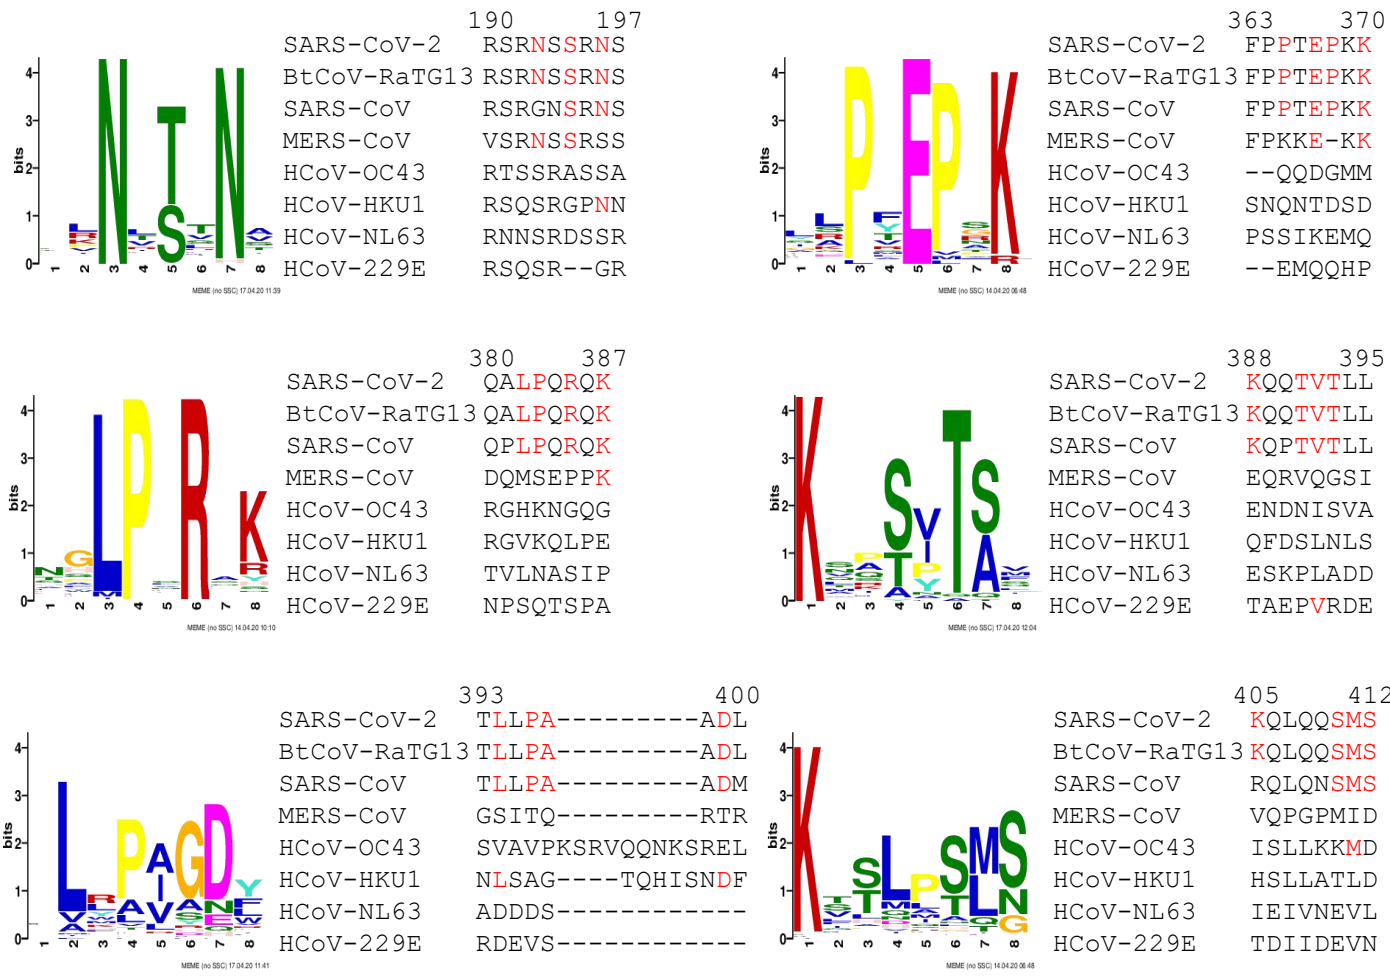

**Fig. S7. Significant epitopes on N protein.** (A) The distribution of the sequence-matched epitopes on N protein. (B) The list of significant epitopes (frequency  $\geq 3$ ). (C) Homology analysis of the significant epitopes among three deadly coronaviruses, i. e., SARS-CoV-2, SARS-CoV and MERS-CoV, four common human coronaviruses, i. e., HCoV-OC43, HKU-1, NL63 and 229E and the highly homologous bat coronavirus BtCoV-RaTG13.

**A**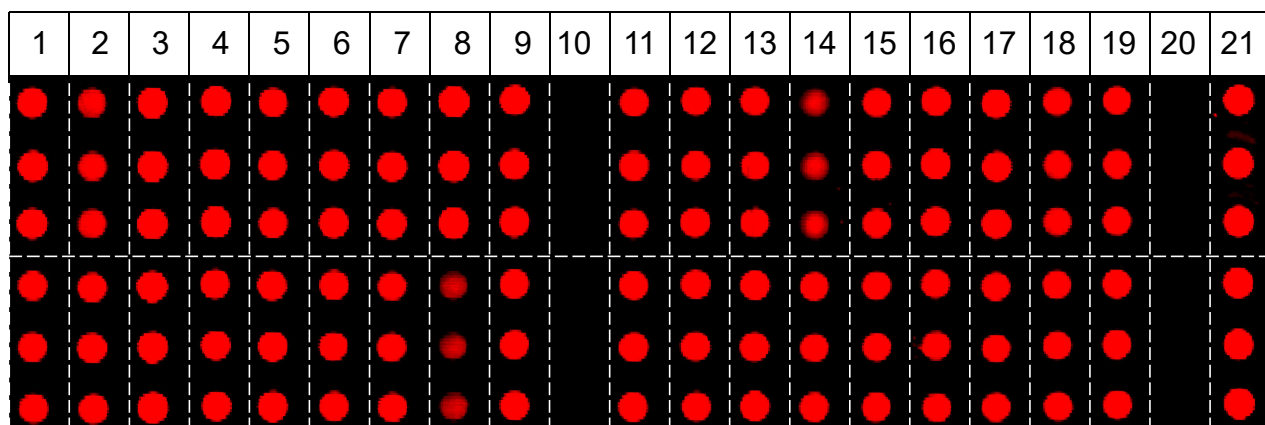**B**

| 1       | 2           | 3           | 4           | 5           | 6           | 7           | 8           | 9           | 10     | 11      | 12         | 13         | 14           | 15         | 16         | 17         | 18         | 19         | 20    | 21      |
|---------|-------------|-------------|-------------|-------------|-------------|-------------|-------------|-------------|--------|---------|------------|------------|--------------|------------|------------|------------|------------|------------|-------|---------|
| Pep1-WT | Pep1-K558A  | Pep1-F559A  | Pep1-L560A  | Pep1-P561A  | Pep1-F562A  | Pep1-Q563A  | Pep1-Q564A  | Pep1-F565A  | Buffer | Pep2-WT | Pep2-L629A | Pep2-T630A | Pep2-Pep631A | Pep2-T632A | Pep2-W633A | Pep2-R634A | Pep2-V635A | Pep2-Y636A | h-IgM | Cy5-BSA |
| Pep3-WT | Pep3-D1153A | Pep3-K1154A | Pep3-Y1155A | Pep3-F1156A | Pep3-K1157A | Pep3-N1158A | Pep3-H1159A | Pep3-T1160A | Buffer | Pep4-WT | Pep4-R466A | Pep4-D467A | Pep4-I468A   | Pep4-S469A | Pep4-T470A | Pep4-E471A | Pep4-I472A | Pep4-Y4T3A | h-IgG | Cy5-BSA |

**C**

| ID          | Sequence           | ID         | Sequence           |
|-------------|--------------------|------------|--------------------|
| Pep1-WT     | <b>KFLPFQQF</b>    | Pep2-WT    | <b>LTPTWRVY</b>    |
| Pep1-K558A  | <b>A</b> FLPFQQF   | Pep2-L629A | <b>A</b> TPTWRVY   |
| Pep1-F559A  | K <b>A</b> LPFQQF  | Pep2-T630A | L <b>A</b> PTWRVY  |
| Pep1-L560A  | KF <b>A</b> PFQQF  | Pep2-P631A | LT <b>A</b> TWRVY  |
| Pep1-P561A  | KFL <b>A</b> FQQF  | Pep2-T632A | LTP <b>A</b> WRVY  |
| Pep1-F562A  | KFLP <b>A</b> QQF  | Pep2-W633A | LTPT <b>A</b> RVY  |
| Pep1-Q563A  | KFLPF <b>A</b> QF  | Pep2-R634A | LTPTW <b>A</b> VY  |
| Pep1-Q564A  | KFLPFQ <b>A</b> F  | Pep2-V635A | LTPTWR <b>A</b> Y  |
| Pep1-F565A  | KFLPFQQ <b>A</b>   | Pep2-Y636A | LTPTWRV <b>A</b>   |
| Pep3-WT     | <b>DKYFKNHT</b>    | Pep4-WT    | <b>RDISTEIIY</b>   |
| Pep3-D1153A | <b>A</b> KYFKNHT   | Pep4-R466A | <b>A</b> DISTEIIY  |
| Pep3-K1154A | D <b>A</b> YFKNHT  | Pep4-D467A | R <b>A</b> ISTEIIY |
| Pep3-Y1155A | DK <b>A</b> FKNHT  | Pep4-I468A | RD <b>A</b> STEIIY |
| Pep3-F1156A | DKY <b>A</b> KNHT  | Pep4-S469A | RDI <b>A</b> TEIIY |
| Pep3-K1157A | DKYF <b>A</b> NHT  | Pep4-T470A | RDIS <b>A</b> EIIY |
| Pep3-N1158A | DKYFK <b>A</b> HNT | Pep4-E471A | RDIST <b>A</b> IY  |
| Pep3-H1159A | DKYFKN <b>A</b> T  | Pep4-I472A | RDISTE <b>A</b> Y  |
| Pep3-T1160A | DKYFKNH <b>A</b>   | Pep4-Y4T3A | RDISTEIA <b>A</b>  |

**Fig. S8. The layout of the peptide microarray of 4 significant epitopes.** (A) Quality control of the peptide microarray. All the peptides were chemically synthesized and conjugated to BSA. The BSA conjugated peptides were printed and immobilized on the microarray. The microarray was stained with an anti-BSA antibody and followed with a Cy5 conjugated secondary antibody. (B) The layout of the peptide microarray. (C) The sequences of the peptides that were included on the peptide microarray.

**A**

| Patient No. | epitope-KFLPFQQF |            | epitope-LTPTWRVY |            | epitope-RDISTEIIY |            |
|-------------|------------------|------------|------------------|------------|-------------------|------------|
|             | AbMap            | Microarray | AbMap            | Microarray | AbMap             | Microarray |
| P1          | ✓                | ✓          | N.D.             | ✓          | N.D.              | ✓          |
| P42         | ✓                | ✓          | ✓                | N.D.       | ✓                 | ✓          |
| P44         | ✓                | ✓          | ✓                | ✓          | N.D.              | ✓          |
| P45         | ✓                | ✓          | ✓                | ✓          | N.D.              | ✓          |
| P28         | ✓                | ✓          | ✓                | ✓          | N.D.              | ✓          |

**B**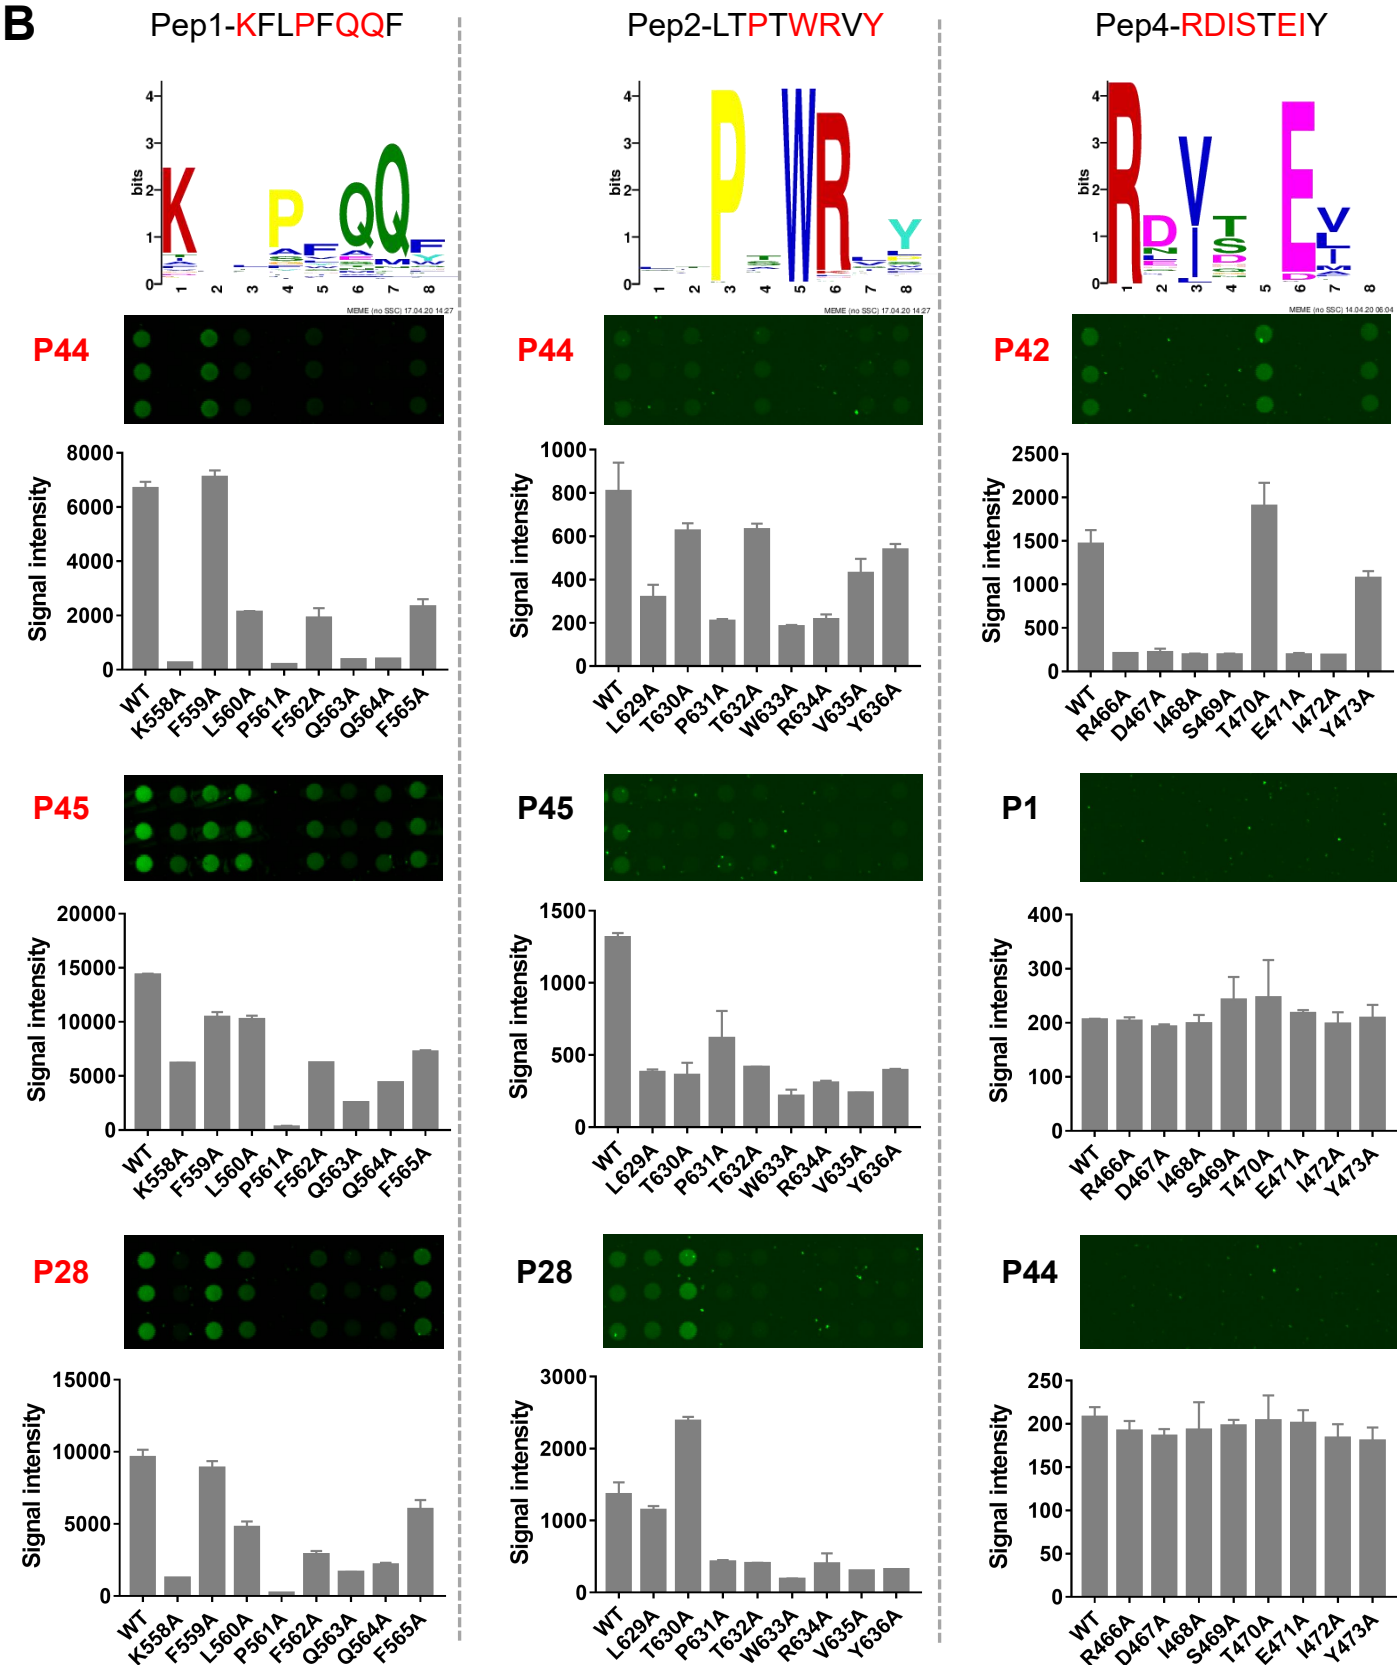**Fig. S9**

**Fig. S9. Validation of critical residues in epitopes by a peptide microarray.** (A) Selected samples were subjected for peptide microarray validation. The summary of the validation results. (B) The microarray results of selected samples against three representative epitopes. Sample with red label indicates the corresponding epitope was identified from this sample by AbMap. While other samples were included as negative controls for corresponding epitopes.

Serum-KLFPFQQF

S1 enriched-KLFPFQQF

P1

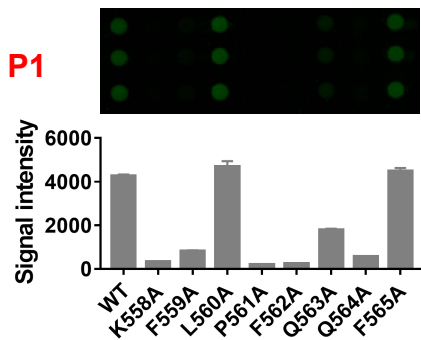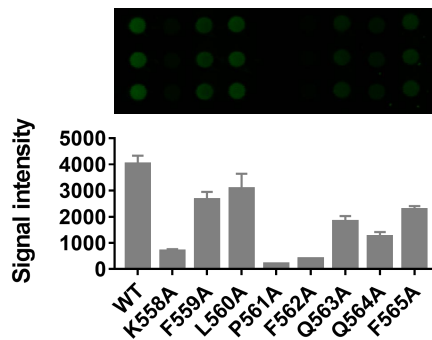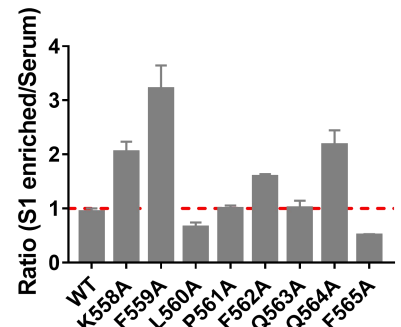

P42

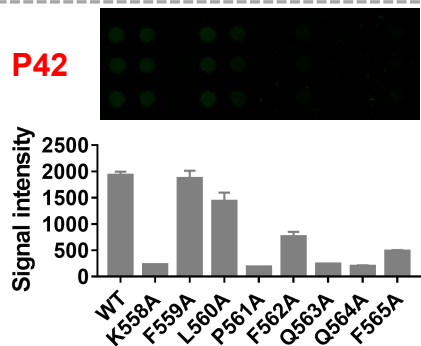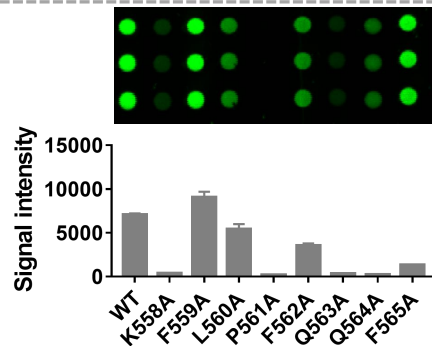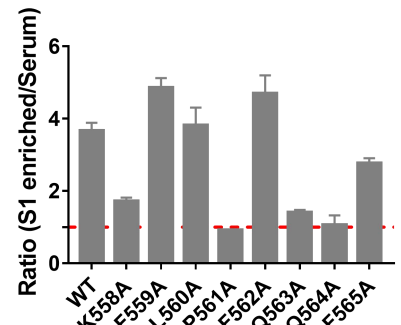

P44

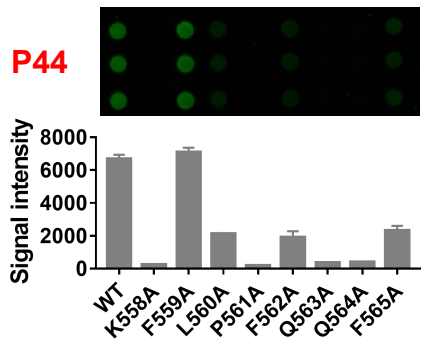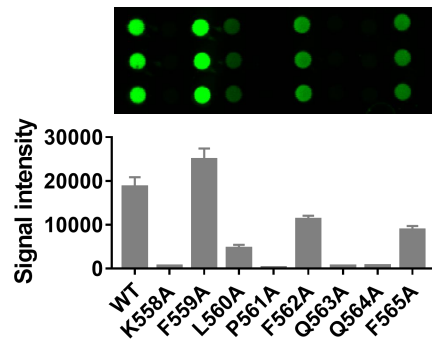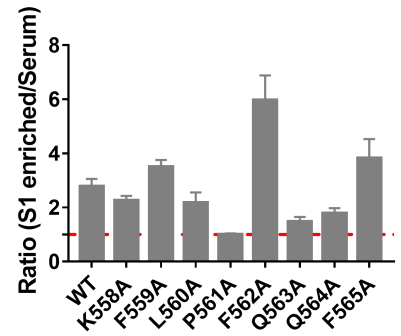

P28

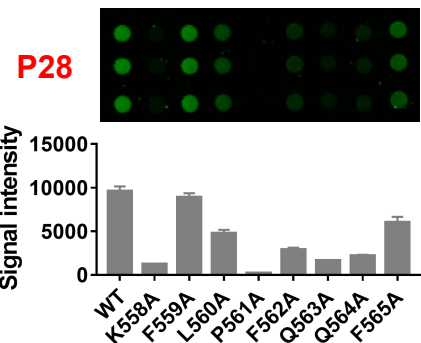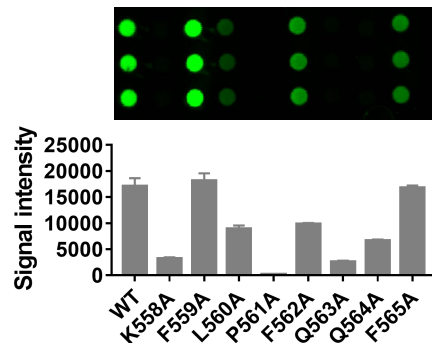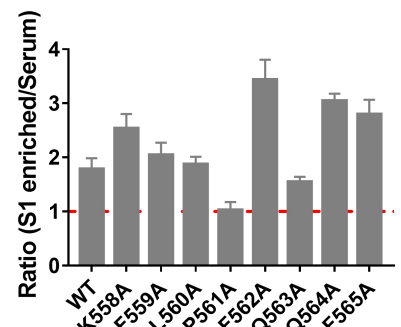

**Fig. S10. Validation of epitope identification procedures by a peptide microarray for more samples: the comparison of sera and protein enriched antibodies. Peptide 1 (Pep 1), which corresponds to Epitope-S1-8 (KLFPFQQF) was selected as an example. Sample with red label indicates the corresponding epitope was identified from this sample by AbMap. The ratio of signal\_intensity (S1 enriched)/ signal\_intensity (serum) for each residue was plotted (right).**

**Table S1. Serum samples tested in this study.**

| <b>COVID-19 patients</b>              |                     | <b>n = 55</b>   |
|---------------------------------------|---------------------|-----------------|
| Gender                                | Male                | 27              |
|                                       | Female              | 28              |
| Age                                   | Mean $\pm$ s.d.     | 41.5 $\pm$ 14.8 |
|                                       | < 60                | 48              |
|                                       | $\geq$ 60           | 7               |
| Severity                              | Mild                | 55              |
|                                       | Severe and critical | 0               |
| Outcome                               | Recovered           | 55              |
|                                       | Death               | 0               |
| Days after symptom onset for sampling |                     | 27.5 $\pm$ 7.7  |
| <b>Control group</b>                  |                     | <b>n = 25</b>   |
| Healthy controls                      |                     | 5               |
| Lung cancer                           |                     | 20              |
| Gender                                | Male                | 15              |
|                                       | Female              | 10              |
| Age                                   | Mean $\pm$ s.d.     | 51.7 $\pm$ 12.7 |
|                                       | < 60                | 18              |
|                                       | $\geq$ 60           | 7               |
